# Supplementary material
Source: Springer Nature journal article supplement (https://www.springermedizin.de/resource/supplementary/13032_2011_54_MOESM1_ESM.pdf/9651532)
Supplement: MOESM1 [file 9651532]

1678 Road traffic crash victims

```
graph TD; A[1678 Road traffic crash victims] --> B[1384 (82.5%) patients alive (Survivors)]; A --> C[294 (17.5%) patients died (Non-survivors)]; B --> D[1332 (96.2%) patients discharged well]; B --> E[52 (3.8%) patients with permanent disabilities];
```

1384 (82.5%) patients alive  
(Survivors)

294 (17.5%) patients died  
(Non-survivors)

1332 (96.2%) patients  
discharged well

52 (3.8%) patients with  
permanent disabilities
